# Supplementary material for: Light-driven efficient dry reforming of methane over Pt/La2O3 with long-term durability
Source: Royal Society of Chemistry journal article supplement (doi:10.1039/d2ta04246k), 2022-01-01
Supplement: d2ta04246k1.pdf [file d2ta04246k1.pdf]

## Supporting Information

### Light-driven Efficient Dry Reforming of Methane over Pt/La<sub>2</sub>O<sub>3</sub> with Long-Time Durability

Yanxia Gao <sup>a,b,c,e</sup>, Qiang Li <sup>a,b,c,e</sup>, Chunqi Wang <sup>a,b,c,e</sup>, Dongxu Yan <sup>a,b,c,e</sup>, Jing Chen <sup>d,e</sup>,  
and Hongpeng Jia <sup>a,b,c,e,\*</sup>

<sup>a</sup> Xiamen Key Laboratory of Materials for Gaseous Pollutant Control, Institute of Urban Environment, Chinese Academy of Sciences, Xiamen 361021, China

<sup>b</sup> Key Laboratory of Urban Pollutant Conversion, Institute of Urban Environment, Chinese Academy of Sciences, Xiamen 361021, China.

<sup>c</sup> CAS Center for Excellence in Regional Atmospheric Environment, Institute of Urban Environment, Chinese Academy of Sciences, Xiamen 361021, China.

<sup>d</sup> Fujian Institute of Research on The Structure of Matter, Chinese Academy of Sciences, Fuzhou 350002, China.

<sup>e</sup> University of Chinese Academy of Sciences, Beijing 100049, China.

\* Corresponding author

E-mail address: hpjia@iue.ac.cn

Tel: 86-592-6190767; Fax: 86-592-6190767

## 1. Preparation

PVP-stabilized Pt nanoparticles (NPs) was obtained by the method in the literature.<sup>1</sup> The mixed solution of H<sub>2</sub>PtCl<sub>6</sub>, PVP and methanol was refluxed in a water bath, rotary evaporation, acetone precipitation, centrifugation and methanol constant volume to obtain the desired Pt NPs solution.

## 2. Characterizations

The actual contents of Pt were detected by inductively coupled plasma-optical emission spectroscopy (ICP-OES). X-ray diffraction (XRD) patterns with scanning angle ( $2\theta$ ) from 5° to 90° were collected on a PANalytical X' Pert Pro diffractometer using Cu K $\alpha$  radiation. High resolution transmission electronic microscopy (HRTEM) images were taken by 3200F transmission electronic microscopy. Energy dispersive X-ray spectrometer (EDS) was used to visualize the elemental distribution by elemental mapping. Carbon deposition was surveyed by thermogravimetric (TG) analysis with a Netzsch TG 209 F3, which was firstly heated to 900 °C and maintain 30 min under N<sub>2</sub>, then cooled to room temperature, and finally heated to 900 °C at a ramp rate of 10 °C/min in air. X-ray photoelectron spectroscopy (XPS) was used to determine the binding energies (B.E.) using the Thermo Scientific ESCALAB 250 instrument. The electron paramagnetic resonance (EPR) spectra under irradiation of full-spectrum light or in the dark were collected using an A300 spectrometer at -196 °C. Diffuse reflection absorption spectra (DRS) of the samples were recorded by a Shimadzu UV-3600 spectrophotometer equipped with an integrating sphere accessory in the diffuse reflectance mode (R) and BaSO<sub>4</sub> as a reference compound.

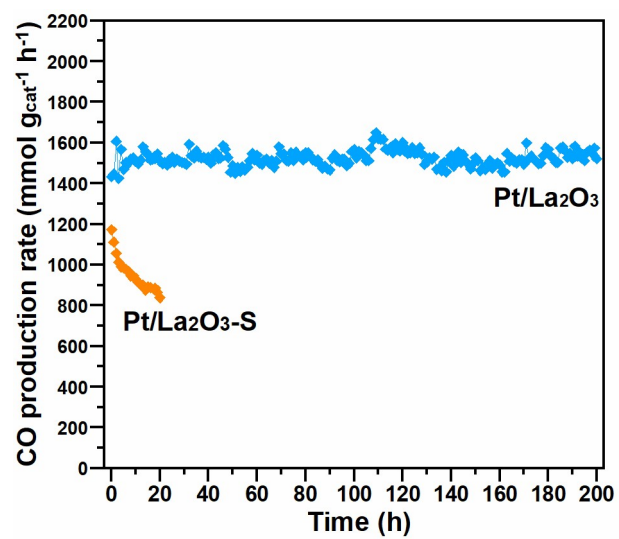

**Fig. S1** The generation rate of CO on Pt/La<sub>2</sub>O<sub>3</sub> and Pt/La<sub>2</sub>O<sub>3</sub>-S during long-time reaction.

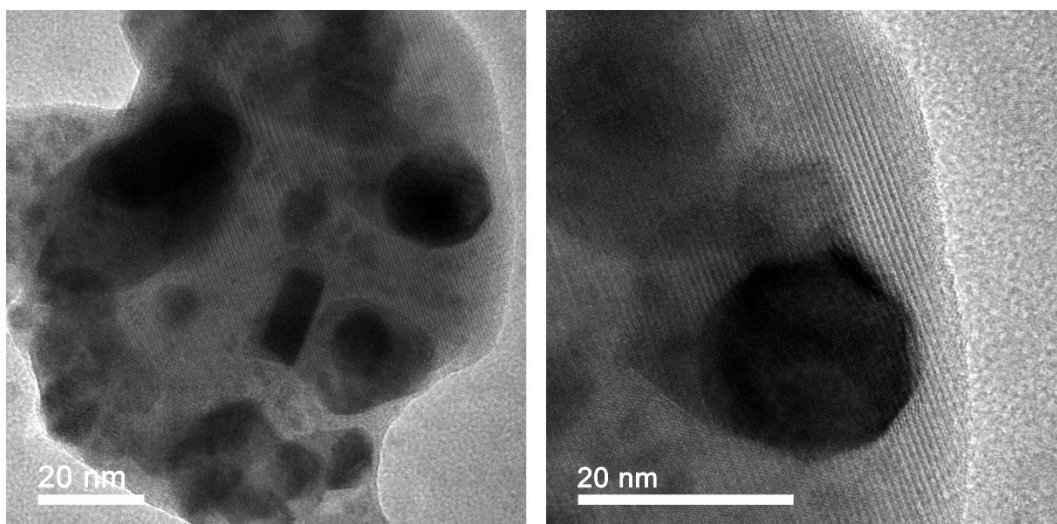

**Fig. S2** HRTEM images of Pt/La<sub>2</sub>O<sub>3</sub>-S-U.

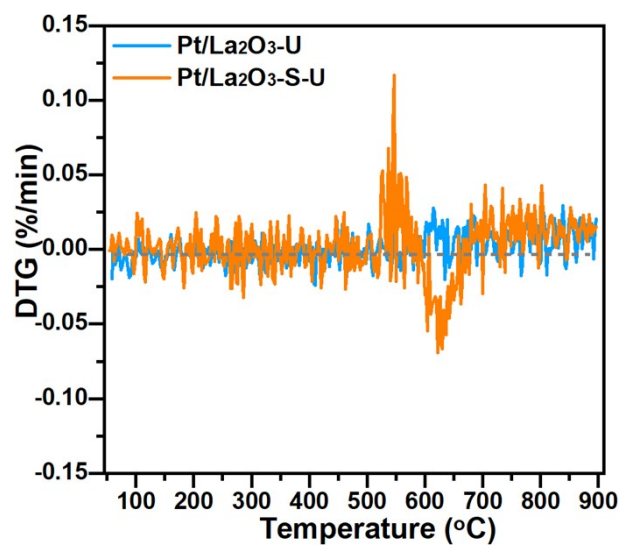

**Fig. S3** TG analysis about DTG.

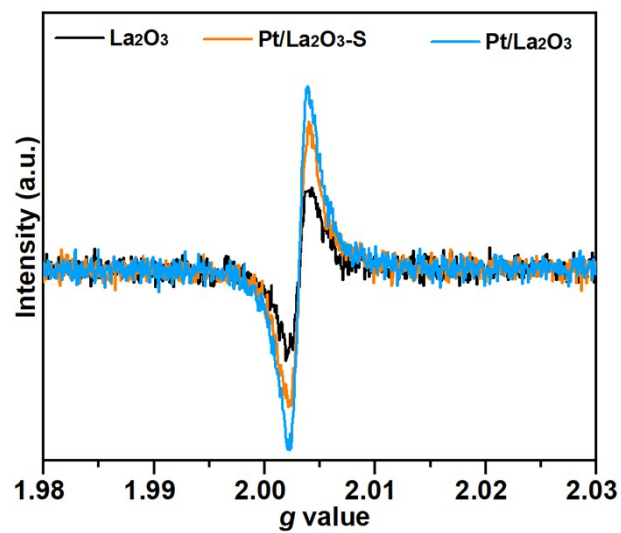

**Fig. S4** EPR spectra of  $\text{La}_2\text{O}_3$ ,  $\text{Pt/La}_2\text{O}_3$  and  $\text{Pt/La}_2\text{O}_3\text{-S}$  under light irradiation.

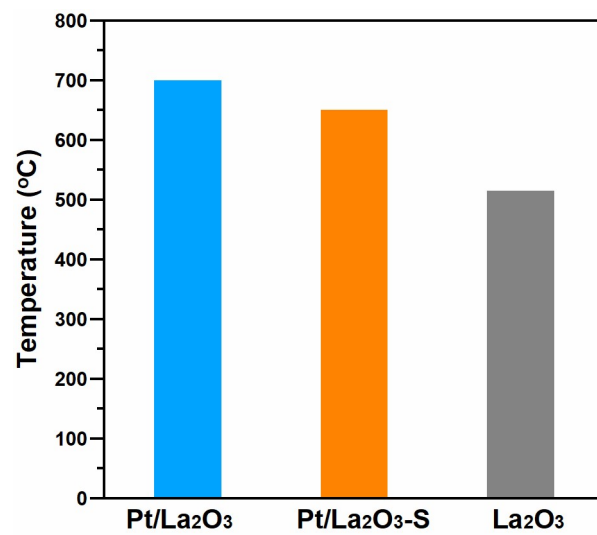

**Fig. S5** The surface temperature value of samples.

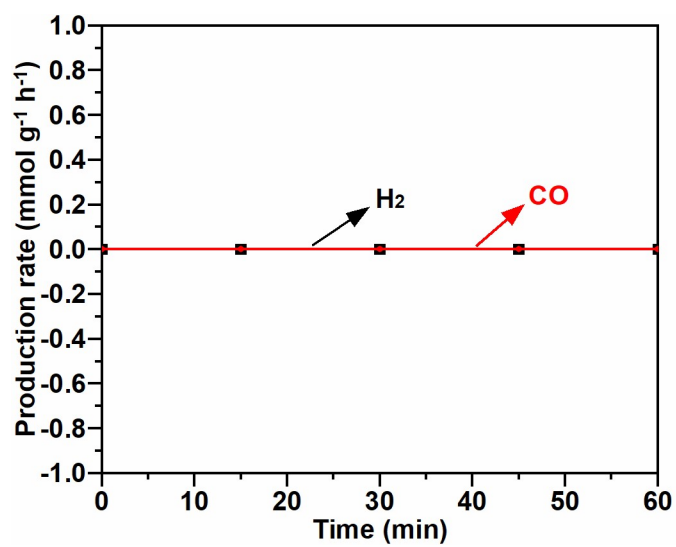

**Fig. S6** The photocatalytic DRM on Pt/La<sub>2</sub>O<sub>3</sub> for 60 minutes at 86 °C.



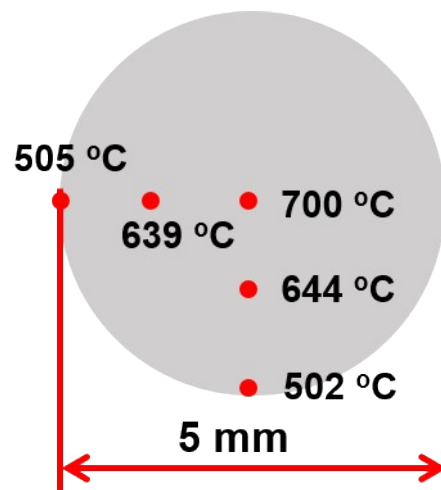

**Fig. S7** The distribution of surface temperature on Pt/La<sub>2</sub>O<sub>3</sub> under irradiation.

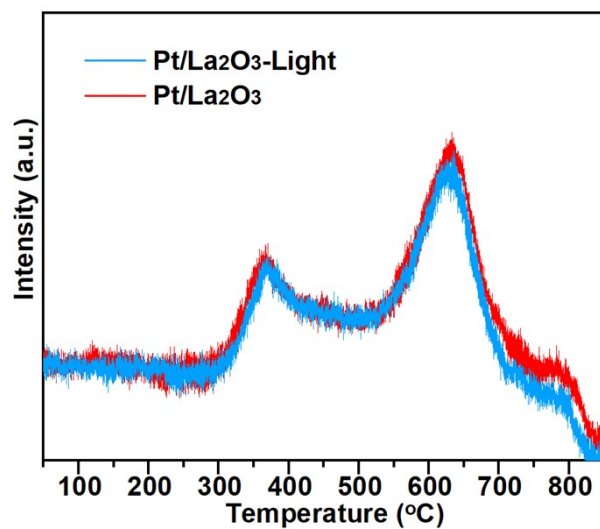

**Fig. S8** CO desorption for CO-TPD on Pt/La<sub>2</sub>O<sub>3</sub> under irradiation and in dark.

**Table S1.** Actual Pt content and XPS results of Pt and O.

| Catalyst                               | Pt loading (wt.%) | Pt              |                  | O <sub>I</sub> /O <sub>II</sub> |
|----------------------------------------|-------------------|-----------------|------------------|---------------------------------|
|                                        |                   | Pt <sup>0</sup> | Pt <sup>2+</sup> |                                 |
| Pt/La <sub>2</sub> O <sub>3</sub>      | 4.84              | 0.62            | 0.38             | 0.19                            |
| Pt/La <sub>2</sub> O <sub>3</sub> -U   | -                 | 0.63            | 0.37             | 0.21                            |
| Pt/La <sub>2</sub> O <sub>3</sub> -S   | 4.24              | 0.38            | 0.62             | 0.15                            |
| Pt/La <sub>2</sub> O <sub>3</sub> -S-U | -                 | 0.64            | 0.36             | 0.24                            |

## Reference

- 1 Lu, G.; Li, S. Z.; Guo, Z.; Farha, O. K.; Hauser, B. G.; Qi, X. Y.; Wang, Y.; Wang, X.; Han, S. Y.; Liu, X. G.; DuChene, J. S.; Zhang, H.; Zhang, Q. C.; Chen, X. D.; Ma, J.; Loo, S. C. J.; Wei, W. D.; Yang, Y. H.; Hupp, J. T.; Huo, F. W. *Nat. Chem.* **2012**, *4*, 310-316.
